# Supplementary material for: stoPET v1.0: A stochastic potential evapotranspiration generator for simulation of climate change impacts
Source: Copernicus journal article supplement (doi:10.5194/gmd-2022-128), 2022-05-11
Supplement: Supplementary file 2 [file gmd-2022-128-supplement.zip]

Archive with 2 entries (2 files):
- supplements/stoPET_SupplementaryInfo.pdf
- supplements/stoPET_UserGuide.pdf
